# Supplementary material for: Evolution of Bacterial Cross-Resistance to Lytic Phages and Albicidin Antibiotic
Source: PubMed Central journal article supplement (PMC8245764; doi:10.3389/fmicb.2021.658374), 2021-06-17
Supplement: Data_Sheet_1.pdf [file Data_Sheet_1.pdf]

*Supplementary Material*

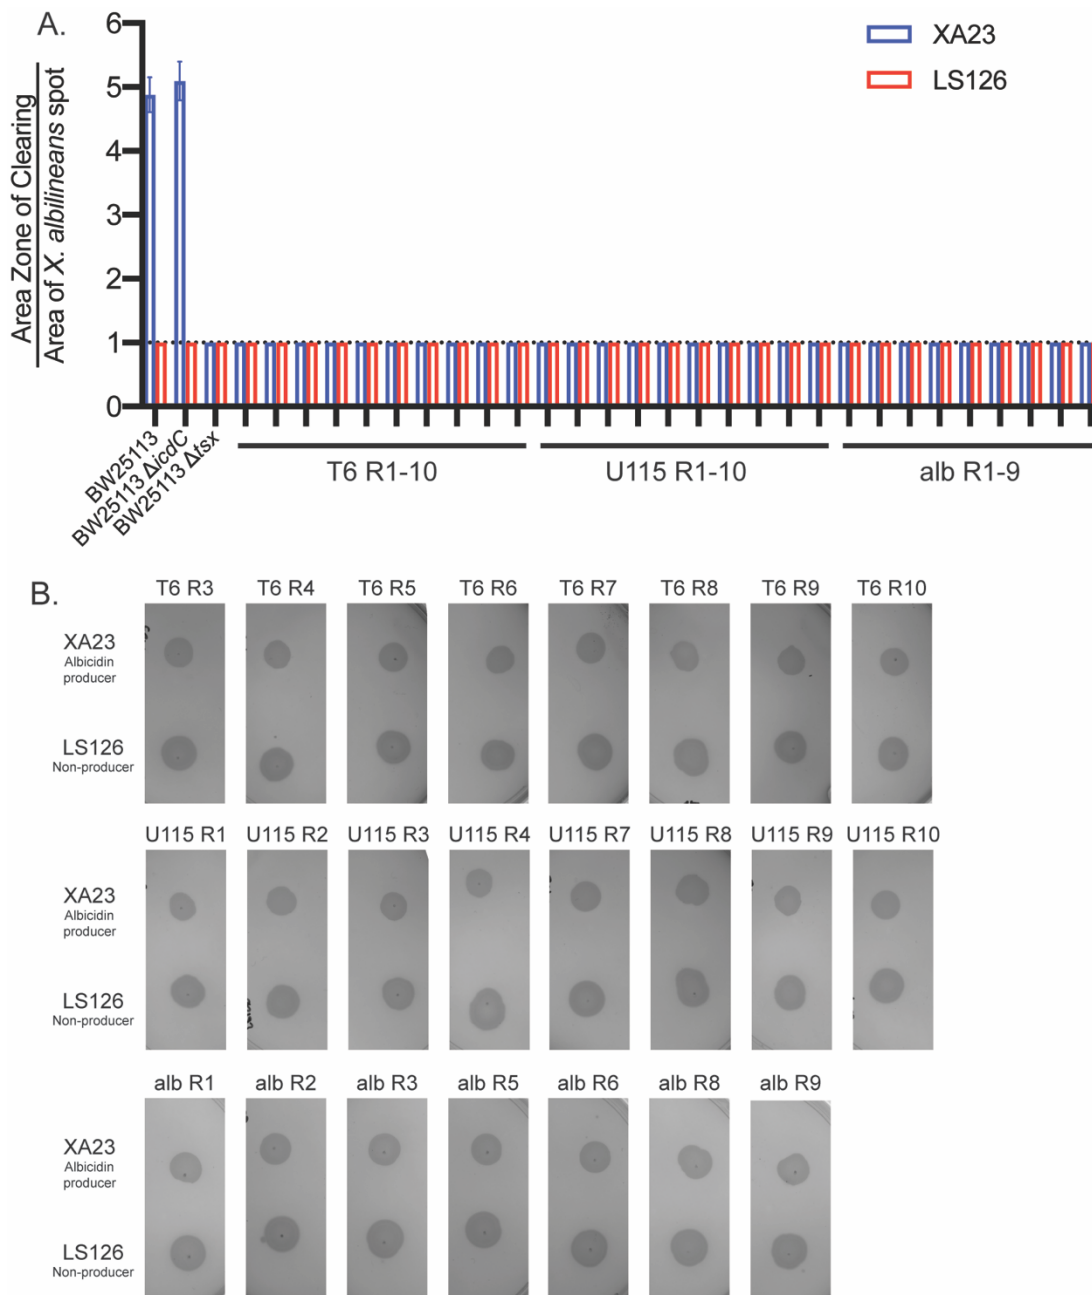

**Supplemental Figure S1.** Tests of albicidin resistance for spontaneous mutants of *E. coli*, selected for resistance to phage T6, phage U115 or albicidin antibiotic; data are for mutants not described in the main text. **A:** Quantification of albicidin resistance (ratio of cleared zone to area of *X. albilineans* growth) showed that each mutant and the *Tsx*-knockout strain, BW25113 $\Delta tsx$ , were albicidin-resistant (ratio = 1.0), whereas wildtype BW25113 and positive-control BW25113 $\Delta icdC$  bacteria were

albicidin-sensitive (ratio > 1.0). **B:** In all cases, mutant growth on agar plates was not inhibited by albicidin-producing *X. albilineans* (XA23), and growth was normal on non-producer strain LS126 controls.

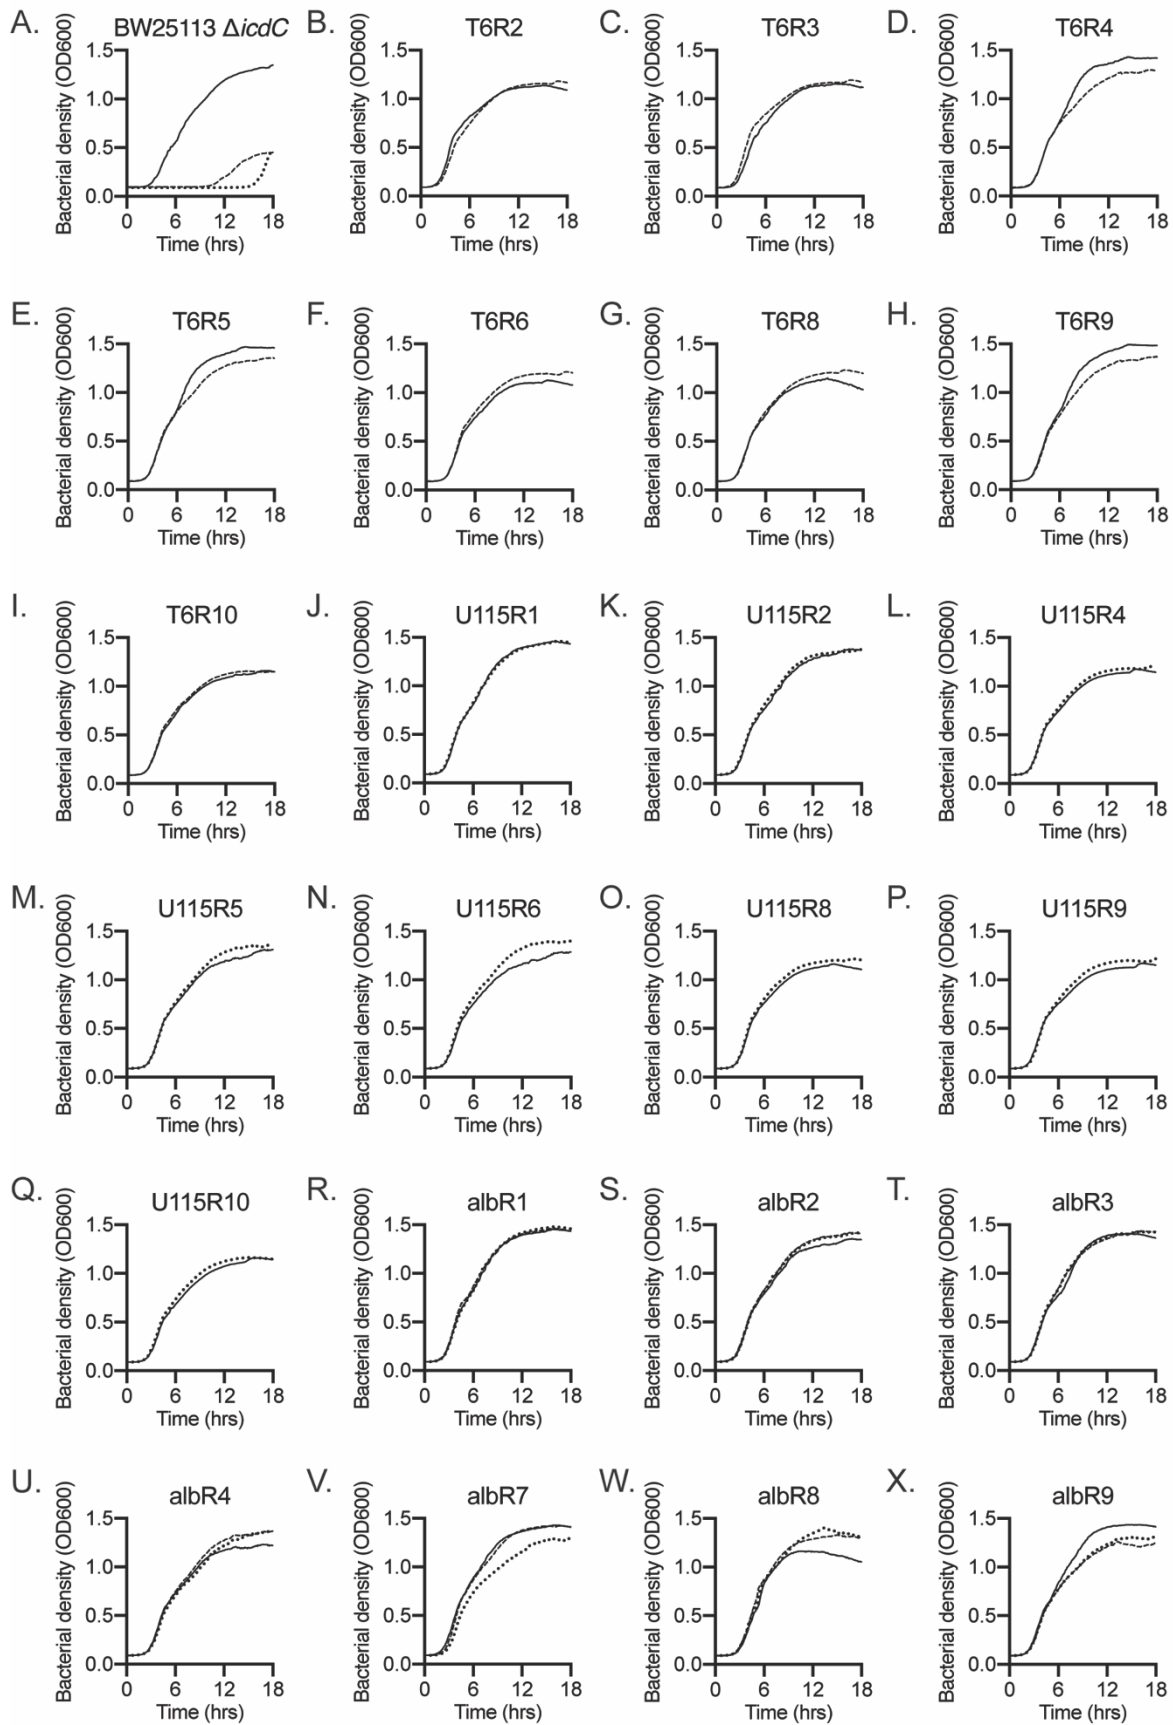

**Supplemental Figure S2.** Growth dynamics of *E. coli* mutants selected for resistance to phage T6, phage U115, or albicidin, in environments with phage T6 (dashed line), with phage U115 (dotted line), and without phages (solid line). **A-X:** In all cases, mutants grew similarly in presence/absence of phages T6 and U115, regardless of their prior selection for phage or albicidin resistance.

**Supplemental Table S1.** Efficiency of plaquing (EOP) for phages T6 and U115 on challenge strains of *E. coli*, selected for spontaneous resistance to each phage or to albicidin. EOP is defined as phage titer (PFU/mL) on the test strain divided by that on wildtype BW25113; EOP = 0 indicates phage growth on the challenge is below the limit of detection (<100 PFU/mL). Positive (BW25113 $\Delta$ *icdC*) and negative (BW25113 $\Delta$ *tsx*) controls confirm expected susceptibility and resistance to each phage in replicate ( $n = 3$ ) assays, whereas, all 29 mutants show cross-resistance to phage infection. Statistical significance (\*;  $P < 0.05$ ) indicates result of an unpaired t-test comparing three replicate measures to the EOP on BW25113 $\Delta$ *icdC*. The ‘^’ indicates a phage with observable turbid clearing of the challenge-bacteria lawn, without making visible plaques.

| <b>Efficiency of Plaquing</b> | <b>Phage T6</b> | <b>Phage U115</b> |
|-------------------------------|-----------------|-------------------|
| BW25113 $\Delta$ <i>icdC</i>  | 1.11 $\pm$ 0.55 | 1.32 $\pm$ 0.16   |
| BW25113 $\Delta$ <i>tsx</i>   | 0*              | 0*                |
| T6 R1                         | 0*              | 0*                |
| T6 R2                         | 0*              | 0*                |
| T6 R3                         | 0*              | 0*                |
| T6 R4                         | 0*              | 0*                |
| T6 R5                         | 0* ^            | 0*                |
| T6 R6                         | 0*              | 0*                |
| T6 R7                         | 0*              | 0*                |
| T6 R8                         | 0*              | 0*                |
| T6 R9                         | 0*              | 0*                |
| T6 R10                        | 0*              | 0*                |
| U115 R1                       | 0*              | 0*                |
| U115 R2                       | 0*              | 0*                |
| U115 R3                       | 0*              | 0*                |
| U115 R4                       | 0*              | 0*                |
| U115 R5                       | 0*              | 0*                |
| U115 R6                       | 0*              | 0*                |
| U115 R7                       | 0*              | 0*                |
| U115 R8                       | 0*              | 0*                |
| U115 R9                       | 0*              | 0*                |
| U115 R10                      | 0*              | 0*                |
| alb R1                        | 0*              | 0*                |
| alb R2                        | 0*              | 0*                |
| alb R3                        | 0*              | 0*                |
| alb R4                        | 0*              | 0*                |
| alb R5                        | 0*              | 0*                |
| alb R6                        | 0*              | 0*                |
| alb R7                        | 0*              | 0*                |
| alb R8                        | 0*              | 0*                |
| alb R9                        | 0*              | 0*                |

**Supplemental Table S2.** Changes to Tsx and sensitivities to phage T6, albicidin and colicin K for *E. coli* strains that were selected for resistance to phage T6 (Schneider et al., 1993) and resistance to albicidin (Fsihi et al., 1993). Missense mutations are mapped onto the crystal structure of Tsx in green in Figure 5. NA indicates data not available.

| Strain  | Alteration in Tsx     | Selection | Sensitivity or Resistance to: |           |           | Reference              |
|---------|-----------------------|-----------|-------------------------------|-----------|-----------|------------------------|
|         |                       |           | T6                            | albicidin | colicin K |                        |
| tsx-504 | N249L                 | T6        | R/S                           | NA        | S         | Schneider et al., 1993 |
| tsx-505 | N254L                 | T6        | R/S                           | NA        | S         | Schneider et al., 1993 |
| tsx-506 | deletion G239-D244    | T6        | R/S                           | NA        | R         | Schneider et al., 1993 |
| tsx-507 | duplication Y229-H237 | T6        | R/S                           | NA        | S         | Schneider et al., 1993 |
| tsx-508 | F27L                  | albicidin | S                             | R         | S         | Fsihi et al., 1993     |
| tsx-509 | G28R                  | albicidin | S                             | R         | S         | Fsihi et al., 1993     |
| tsx-510 | G28E                  | albicidin | S                             | R         | S         | Fsihi et al., 1993     |
| tsx-511 | S217R                 | albicidin | S                             | R         | S         | Fsihi et al., 1993     |
| tsx-512 | G239D                 | albicidin | S                             | R         | S         | Fsihi et al., 1993     |
| tsx-513 | G240D                 | albicidin | S                             | R/S       | S         | Fsihi et al., 1993     |
| tsx-514 | duplication G21-N33   | albicidin | R/S                           | R         | S         | Fsihi et al., 1993     |

**Supplemental Table S3.** Estimated minimum inhibitory concentrations of antibiotics ciprofloxacin and ampicillin, capable of inhibiting the growth of each test bacterial strain.

| <b>Strain</b>                | <b>Ampicillin<br/>(<math>\mu\text{g/mL}</math>)</b> | <b>Ciprofloxacin<br/>(<math>\text{ng/mL}</math>)</b> |
|------------------------------|-----------------------------------------------------|------------------------------------------------------|
|                              | 20 $\pm$ 0                                          | 11.67 $\pm$ 7.64                                     |
| BW25113                      | 20 $\pm$ 0                                          | 11.67 $\pm$ 7.64                                     |
|                              | 20 $\pm$ 0                                          | 13.33 $\pm$ 5.77                                     |
| BW25113 $\Delta$ <i>icdC</i> | 20 $\pm$ 0                                          | 13.33 $\pm$ 5.77                                     |
|                              | 20 $\pm$ 0                                          | 6.67 $\pm$ 2.89                                      |
| BW25113 $\Delta$ <i>tsx</i>  | 26.67 $\pm$ 11.55                                   | 10 $\pm$ 0                                           |
| T6 R1                        | 20 $\pm$ 0                                          | 6.67 $\pm$ 2.89                                      |
| T6 R2                        | 20 $\pm$ 0                                          | 10 $\pm$ 0                                           |
| T6 R3                        | 20 $\pm$ 0                                          | 8.33 $\pm$ 2.89                                      |
| T6 R4                        | 20 $\pm$ 0                                          | 8.33 $\pm$ 2.89                                      |
| T6 R5                        | 20 $\pm$ 0                                          | 10 $\pm$ 0                                           |
| T6 R6                        | 20 $\pm$ 0                                          | 8.33 $\pm$ 2.89                                      |
| T6 R7                        | 20 $\pm$ 0                                          | 11.67 $\pm$ 7.64                                     |
| T6 R8                        | 20 $\pm$ 0                                          | 8.33 $\pm$ 2.89                                      |
| T6 R9                        | 20 $\pm$ 0                                          | 13.33 $\pm$ 5.77                                     |
| T6 R10                       | 20 $\pm$ 0                                          | 13.33 $\pm$ 5.77                                     |
| U115 R1                      | 20 $\pm$ 0                                          | 10 $\pm$ 0                                           |
| U115 R2                      | 20 $\pm$ 0                                          | 10 $\pm$ 0                                           |
| U115 R3                      | 20 $\pm$ 0                                          | 10 $\pm$ 0                                           |
| U115 R4                      | 20 $\pm$ 0                                          | 8.33 $\pm$ 2.89                                      |
| U115 R5                      | 20 $\pm$ 0                                          | 8.33 $\pm$ 2.89                                      |
| U115 R6                      | 20 $\pm$ 0                                          | 6.67 $\pm$ 2.89                                      |
| U115 R7                      | 20 $\pm$ 0                                          | 8.33 $\pm$ 2.89                                      |
| U115 R8                      | 10 $\pm$ 0                                          | 8.33 $\pm$ 2.89                                      |
| U115 R9                      | 20 $\pm$ 0                                          | 11.67 $\pm$ 7.64                                     |
| U115 R10                     | 20 $\pm$ 0                                          | 8.33 $\pm$ 2.89                                      |
| alb R1                       | 20 $\pm$ 0                                          | 11.67 $\pm$ 7.64                                     |
| alb R2                       | 20 $\pm$ 0                                          | 13.33 $\pm$ 5.77                                     |
| alb R3                       | 20 $\pm$ 0                                          | 13.33 $\pm$ 5.77                                     |
| alb R4                       | 20 $\pm$ 0                                          | 13.33 $\pm$ 5.77                                     |
| alb R5                       | 20 $\pm$ 0                                          | 8.33 $\pm$ 2.89                                      |
| alb R6                       | 20 $\pm$ 0                                          | 8.33 $\pm$ 2.89                                      |
| alb R7                       | 20 $\pm$ 0                                          | 8.33 $\pm$ 2.89                                      |
| alb R8                       | 20 $\pm$ 0                                          | 13.33 $\pm$ 5.77                                     |
| albR9                        | 20 $\pm$ 0                                          | 10 $\pm$ 0                                           |

**Supplemental Table S4.** Bacterial and phage strains used during this study.

| <b>Strains</b>        | <b>Species</b>         | <b>Antibiotic Resistance Cassette</b> | <b>Reference or Source</b> |
|-----------------------|------------------------|---------------------------------------|----------------------------|
| BW25113               | <i>E. coli</i>         | -                                     | CGSC                       |
| BW25113 $\Delta icdC$ | <i>E. coli</i>         | KanR                                  | CGSC                       |
| BW25113 $\Delta tsx$  | <i>E. coli</i>         | KanR                                  | CGSC                       |
| T6 R1                 | <i>E. coli</i>         | -                                     | This study                 |
| T6 R2                 | <i>E. coli</i>         | -                                     | This study                 |
| T6 R3                 | <i>E. coli</i>         | -                                     | This study                 |
| T6 R4                 | <i>E. coli</i>         | -                                     | This study                 |
| T6 R5                 | <i>E. coli</i>         | -                                     | This study                 |
| T6 R6                 | <i>E. coli</i>         | -                                     | This study                 |
| T6 R7                 | <i>E. coli</i>         | -                                     | This study                 |
| T6 R8                 | <i>E. coli</i>         | -                                     | This study                 |
| T6 R9                 | <i>E. coli</i>         | -                                     | This study                 |
| T6 R10                | <i>E. coli</i>         | -                                     | This study                 |
| U115 R1               | <i>E. coli</i>         | -                                     | This study                 |
| U115 R2               | <i>E. coli</i>         | -                                     | This study                 |
| U115 R3               | <i>E. coli</i>         | -                                     | This study                 |
| U115 R4               | <i>E. coli</i>         | -                                     | This study                 |
| U115 R5               | <i>E. coli</i>         | -                                     | This study                 |
| U115 R6               | <i>E. coli</i>         | -                                     | This study                 |
| U115 R7               | <i>E. coli</i>         | -                                     | This study                 |
| U115 R8               | <i>E. coli</i>         | -                                     | This study                 |
| U115 R9               | <i>E. coli</i>         | -                                     | This study                 |
| U115 R10              | <i>E. coli</i>         | -                                     | This study                 |
| alb R1                | <i>E. coli</i>         | -                                     | This study                 |
| alb R2                | <i>E. coli</i>         | -                                     | This study                 |
| alb R3                | <i>E. coli</i>         | -                                     | This study                 |
| alb R4                | <i>E. coli</i>         | -                                     | This study                 |
| alb R5                | <i>E. coli</i>         | -                                     | This study                 |
| alb R6                | <i>E. coli</i>         | -                                     | This study                 |
| alb R7                | <i>E. coli</i>         | -                                     | This study                 |
| alb R8                | <i>E. coli</i>         | -                                     | This study                 |
| alb R9                | <i>E. coli</i>         | -                                     | This study                 |
| XA23                  | <i>X. albilineans</i>  | -                                     | Rott et al., 1996          |
| LS126                 | <i>X. albilineans</i>  | KanR, StR                             | Rott et al., 1996          |
| <b>Phage</b>          |                        | <b>Reference or Source</b>            |                            |
| T6                    | J. Wertz (Yale U)      |                                       |                            |
| U115                  | Kortright et al., 2020 |                                       |                            |

KanR, Kanamycin resistance; StR, Streptomycin resistance; CGSC, Coli Genetic Stock Center
